# Supplementary material for: Probiotic strains alleviated OVA-induced food allergy in mice by regulating the gut microbiota and improving the level of indoleacrylic acid in fecal samples
Source: Royal Society of Chemistry journal article supplement (doi:10.1039/d1fo03520g), 2022-01-01
Supplement: d1fo03520g1.pdf [file d1fo03520g1.pdf]

### Supplemental Table Captions

**Table S1** - Body weight (g) of mice at different time.

| Day          | 0     | 7     | 14    | 17    | 21    | 28    | 31    | 32    | 34    | 36    | 38    | 40    | 42    | 43    |
|--------------|-------|-------|-------|-------|-------|-------|-------|-------|-------|-------|-------|-------|-------|-------|
| Contro<br>I  | 17.20 | 17.32 | 17.72 | 17.75 | 18.02 | 17.55 | 18.75 | 18.61 | 18.27 | 18.96 | 19.09 | 18.78 | 18.73 | 19.13 |
|              | 16.04 | 16.35 | 16.92 | 16.79 | 16.72 | 17.06 | 17.32 | 17.33 | 17.19 | 17.87 | 17.95 | 17.54 | 17.75 | 18.03 |
|              | 15.29 | 17.31 | 17.46 | 17.47 | 18.09 | 18.49 | 18.54 | 18.44 | 18.45 | 18.65 | 19.25 | 19.25 | 19.23 | 19.48 |
|              | 15.94 | 16.26 | 16.72 | 16.60 | 17.17 | 17.91 | 18.00 | 17.90 | 17.72 | 18.85 | 18.10 | 18.10 | 18.23 | 18.95 |
|              | 17.55 | 18.16 | 19.11 | 19.61 | 19.25 | 19.69 | 20.09 | 19.85 | 19.90 | 20.51 | 19.56 | 19.56 | 19.64 | 20.59 |
|              | 16.29 | 17.16 | 17.77 | 17.91 | 18.08 | 18.13 | 18.04 | 18.06 | 18.24 | 18.76 | 18.00 | 18.00 | 18.20 | 18.71 |
| Model        | 17.12 | 16.94 | 17.61 | 17.79 | 18.20 | 17.72 | 16.56 | 15.95 | 15.32 | 14.50 | 13.67 | 13.08 | 12.96 | 12.69 |
|              | 15.13 | 16.44 | 17.24 | 16.92 | 16.58 | 16.93 | 15.62 | 14.70 | 13.85 | 13.10 | 12.73 | 12.07 | 11.89 | 11.70 |
|              | 14.82 | 15.10 | 15.42 | 15.43 | 15.41 | 15.64 | 14.06 | 13.47 | 13.12 | 12.31 | 11.46 | 11.04 | 10.59 | 10.49 |
|              | 16.21 | 15.10 | 15.84 | 15.82 | 15.94 | 14.73 | 14.43 | 14.06 | 13.82 | 13.37 | 13.05 | 12.34 | 12.34 | 11.92 |
|              | 17.56 | 17.96 | 19.27 | 18.94 | 19.00 | 18.85 | 17.27 | 16.26 | 15.49 | 14.75 | 13.90 | 12.61 | 12.31 | 12.13 |
|              | 18.08 | 17.49 | 18.97 | 18.85 | 18.47 | 18.03 | 17.55 | 16.44 | 15.69 | 14.81 | 13.96 | 13.13 | 12.72 | 12.66 |
| CCFM1<br>1   | 15.03 | 14.92 | 15.98 | 15.96 | 15.96 | 16.43 | 15.29 | 14.81 | 14.18 | 13.94 | 13.06 | 12.74 | 12.55 | 12.32 |
|              | 15.73 | 15.36 | 16.42 | 16.62 | 17.33 | 15.66 | 15.64 | 15.12 | 14.30 | 13.79 | 13.00 | 12.20 | 11.81 | 11.56 |
|              | 16.93 | 17.08 | 18.36 | 18.85 | 17.54 | 18.45 | 18.00 | 17.59 | 16.53 | 15.95 | 15.03 | 14.61 | 14.15 | 13.82 |
|              | 17.96 | 17.48 | 18.44 | 18.67 | 18.41 | 19.16 | 18.80 | 18.00 | 17.93 | 17.97 | 18.28 | 17.17 | 16.50 | 15.84 |
|              | 16.78 | 17.50 | 17.99 | 17.77 | 16.63 | 18.14 | 17.25 | 16.59 | 16.33 | 16.08 | 15.91 | 15.31 | 14.88 | 14.84 |
|              | 15.90 | 15.32 | 16.31 | 16.78 | 17.18 | 17.59 | 16.41 | 15.66 | 15.08 | 14.80 | 14.32 | 13.96 | 13.36 | 13.26 |
| CCFM1<br>189 | 16.67 | 16.84 | 17.61 | 17.96 | 17.81 | 18.96 | 19.04 | 18.90 | 18.70 | 18.55 | 18.68 | 18.52 | 18.27 | 17.70 |
|              | 15.90 | 16.58 | 17.00 | 17.14 | 16.84 | 17.91 | 16.95 | 16.59 | 16.14 | 15.67 | 15.41 | 15.26 | 15.11 | 14.64 |
|              | 15.37 | 14.91 | 16.18 | 16.26 | 15.86 | 16.15 | 15.00 | 14.32 | 13.57 | 13.22 | 12.20 | 11.69 | 11.22 | 11.26 |
|              | 17.89 | 17.58 | 19.20 | 20.08 | 20.36 | 21.05 | 21.00 | 20.52 | 21.73 | 21.18 | 20.73 | 20.16 | 19.71 | 19.67 |
|              | 15.70 | 15.23 | 16.67 | 16.84 | 16.93 | 17.45 | 17.05 | 16.38 | 16.45 | 16.05 | 15.31 | 14.86 | 14.51 | 14.16 |
|              | 17.38 | 17.14 | 18.60 | 18.73 | 18.77 | 19.00 | 19.00 | 18.10 | 17.13 | 16.87 | 16.14 | 15.53 | 15.13 | 14.63 |
| CCFM1<br>072 | 18.30 | 17.96 | 19.11 | 19.48 | 18.32 | 19.90 | 19.86 | 19.37 | 18.84 | 17.99 | 18.26 | 17.50 | 16.51 | 16.28 |
|              | 17.94 | 17.23 | 17.47 | 17.43 | 17.64 | 16.55 | 15.37 | 14.87 | 13.86 | 13.14 | 12.80 | 11.91 | 11.45 | 11.24 |
|              | 14.03 | 14.22 | 14.80 | 15.35 | 14.77 | 15.43 | 15.91 | 15.59 | 15.51 | 15.01 | 15.37 | 14.63 | 14.41 | 14.02 |
|              | 17.03 | 15.78 | 16.67 | 18.32 | 16.75 | 16.80 | 15.72 | 15.00 | 14.60 | 14.00 | 13.28 | 12.56 | 12.26 | 12.08 |
|              | 15.73 | 15.72 | 17.10 | 17.17 | 16.74 | 14.44 | 14.58 | 14.23 | 14.05 | 13.17 | 12.63 | 12.16 | 11.73 | 11.80 |
|              | 16.02 | 15.88 | 16.11 | 16.30 | 15.61 | 14.63 | 15.37 | 15.00 | 14.67 | 14.66 | 14.17 | 14.01 | 13.44 | 13.23 |
| CCFM1<br>190 | 16.24 | 16.02 | 17.01 | 16.73 | 17.15 | 17.64 | 17.52 | 17.18 | 18.08 | 17.67 | 17.54 | 17.40 | 17.06 | 16.84 |
|              | 16.89 | 16.73 | 18.12 | 18.01 | 18.38 | 17.96 | 17.50 | 16.98 | 15.72 | 15.65 | 14.74 | 14.20 | 13.89 | 13.73 |
|              | 15.09 | 15.76 | 16.10 | 17.19 | 15.49 | 16.21 | 16.61 | 15.93 | 15.16 | 14.83 | 15.04 | 14.62 | 14.63 | 14.14 |
|              | 16.16 | 15.26 | 16.44 | 17.08 | 16.59 | 18.06 | 17.89 | 17.71 | 17.86 | 17.95 | 18.11 | 17.64 | 17.40 | 17.37 |
|              | 16.65 | 15.62 | 16.80 | 16.10 | 16.85 | 16.61 | 15.39 | 15.25 | 14.29 | 14.23 | 13.76 | 13.21 | 12.62 | 12.37 |
|              | 17.83 | 16.08 | 17.80 | 17.92 | 18.11 | 18.00 | 18.13 | 18.63 | 18.26 | 18.00 | 17.71 | 17.36 | 16.96 | 17.10 |
| HeNJZ<br>8M1 | 17.21 | 15.77 | 17.47 | 17.91 | 17.90 | 17.42 | 16.44 | 15.46 | 14.89 | 13.61 | 12.55 | 11.83 | 11.38 | 11.43 |
|              | 16.32 | 15.67 | 16.19 | 16.34 | 15.14 | 16.45 | 16.63 | 16.76 | 16.68 | 15.87 | 15.43 | 15.37 | 14.76 | 14.68 |
|              | 16.63 | 14.73 | 16.63 | 17.08 | 16.91 | 14.75 | 15.00 | 14.49 | 14.00 | 13.41 | 12.93 | 12.29 | 11.69 | 11.67 |
|              | 16.14 | 15.32 | 17.08 | 17.43 | 17.51 | 17.08 | 16.50 | 15.70 | 15.77 | 14.94 | 14.16 | 13.26 | 12.55 | 12.26 |

|       |       |       |       |       |       |       |       |       |       |       |       |       |       |       |
|-------|-------|-------|-------|-------|-------|-------|-------|-------|-------|-------|-------|-------|-------|-------|
|       | 16.10 | 15.25 | 17.20 | 17.72 | 17.16 | 17.16 | 16.28 | 15.22 | 15.00 | 14.12 | 13.12 | 12.32 | 12.02 | 11.63 |
|       | 18.63 | 16.78 | 17.99 | 18.49 | 18.78 | 19.64 | 18.42 | 17.88 | 17.85 | 19.21 | 18.85 | 17.73 | 16.77 | 16.70 |
|       | 16.82 | 15.82 | 17.45 | 18.11 | 18.55 | 18.36 | 17.45 | 17.61 | 18.20 | 18.20 | 17.55 | 17.14 | 16.80 | 16.50 |
| CCFM1 | 17.13 | 16.38 | 17.84 | 18.35 | 18.07 | 18.87 | 18.64 | 18.72 | 18.29 | 18.37 | 18.00 | 17.19 | 16.58 | 16.96 |
| 029   | 17.91 | 17.85 | 17.95 | 17.55 | 17.83 | 18.71 | 18.55 | 18.47 | 18.28 | 18.12 | 18.43 | 18.76 | 18.75 | 18.36 |
|       | 17.55 | 16.92 | 19.21 | 19.31 | 19.51 | 19.99 | 20.00 | 19.70 | 19.64 | 18.45 | 18.01 | 17.69 | 17.14 | 17.29 |
|       | 17.02 | 16.12 | 17.24 | 17.46 | 17.73 | 17.22 | 18.26 | 18.52 | 17.88 | 17.14 | 17.05 | 16.67 | 16.70 | 16.11 |

**Table S2 - Body weight percentage (body weight percentage (%) = current weight/initial weight (day 0) × 100%) of mice at different time.**

| Day     | 7      | 14     | 17     | 21     | 28     | 31     | 32     | 34     | 36     | 38     | 40     | 42     | 43     |
|---------|--------|--------|--------|--------|--------|--------|--------|--------|--------|--------|--------|--------|--------|
| Control | 100.70 | 103.02 | 103.20 | 104.77 | 102.03 | 109.01 | 108.20 | 106.22 | 110.23 | 110.99 | 109.19 | 108.90 | 111.22 |
|         | 101.93 | 105.49 | 104.68 | 104.24 | 106.36 | 107.98 | 108.04 | 107.17 | 111.41 | 111.91 | 109.35 | 110.66 | 112.41 |
|         | 113.21 | 114.19 | 114.26 | 118.31 | 120.93 | 121.26 | 120.60 | 120.67 | 121.98 | 125.90 | 125.90 | 125.77 | 127.40 |
|         | 102.01 | 104.89 | 104.14 | 107.72 | 112.36 | 112.92 | 112.30 | 111.17 | 118.26 | 113.55 | 113.55 | 114.37 | 118.88 |
|         | 103.48 | 108.89 | 111.74 | 109.69 | 112.19 | 114.47 | 113.11 | 113.39 | 116.87 | 111.45 | 111.45 | 111.91 | 117.32 |
|         | 105.34 | 109.09 | 109.94 | 110.99 | 111.30 | 110.74 | 110.87 | 111.97 | 115.16 | 110.50 | 110.50 | 111.72 | 114.86 |
| Model   | 98.95  | 102.86 | 103.91 | 106.31 | 103.50 | 96.73  | 93.17  | 89.49  | 84.70  | 79.85  | 76.40  | 75.70  | 74.12  |
|         | 108.66 | 113.95 | 111.83 | 109.58 | 111.90 | 103.24 | 97.16  | 91.54  | 86.58  | 84.14  | 79.78  | 78.59  | 77.33  |
|         | 101.89 | 104.05 | 104.12 | 103.98 | 105.53 | 94.87  | 90.89  | 88.53  | 83.06  | 77.33  | 74.49  | 71.46  | 70.78  |
|         | 93.15  | 97.72  | 97.59  | 98.33  | 90.87  | 89.02  | 86.74  | 85.26  | 82.48  | 80.51  | 76.13  | 76.13  | 73.53  |
|         | 102.28 | 109.74 | 107.86 | 108.20 | 107.35 | 98.35  | 92.60  | 88.21  | 84.00  | 79.16  | 71.81  | 70.10  | 69.08  |
|         | 96.74  | 104.92 | 104.26 | 102.16 | 99.72  | 97.07  | 90.93  | 86.78  | 81.91  | 77.21  | 72.62  | 70.35  | 70.02  |
| CCFM1   | 99.27  | 106.32 | 106.19 | 106.19 | 109.31 | 101.73 | 98.54  | 94.34  | 92.75  | 86.89  | 84.76  | 83.50  | 81.97  |
|         | 97.65  | 104.39 | 105.66 | 110.17 | 99.55  | 99.43  | 96.12  | 90.91  | 87.67  | 82.64  | 77.56  | 75.08  | 73.49  |
|         | 100.89 | 108.45 | 111.34 | 103.60 | 108.98 | 106.32 | 103.90 | 97.64  | 94.21  | 88.78  | 86.30  | 83.58  | 81.63  |
|         | 97.33  | 102.67 | 103.95 | 102.51 | 106.68 | 104.68 | 100.22 | 99.83  | 100.06 | 101.78 | 95.60  | 91.87  | 88.20  |
|         | 104.29 | 107.21 | 105.90 | 99.11  | 108.10 | 102.80 | 98.87  | 97.32  | 95.83  | 94.82  | 91.24  | 88.68  | 88.44  |
|         | 96.35  | 102.58 | 105.53 | 108.05 | 110.63 | 103.21 | 98.49  | 94.84  | 93.08  | 90.06  | 87.80  | 84.03  | 83.40  |
| CCFM1   | 101.02 | 105.64 | 107.74 | 106.84 | 113.74 | 114.22 | 113.38 | 112.18 | 111.28 | 112.06 | 111.10 | 109.60 | 106.18 |
|         | 104.28 | 106.92 | 107.80 | 105.91 | 112.64 | 106.60 | 104.34 | 101.51 | 98.55  | 96.92  | 95.97  | 95.03  | 92.08  |
|         | 97.01  | 105.27 | 105.79 | 103.19 | 105.07 | 97.59  | 93.17  | 88.29  | 86.01  | 79.38  | 76.06  | 73.00  | 73.26  |
|         | 98.27  | 107.32 | 112.24 | 113.81 | 117.66 | 117.38 | 114.70 | 121.46 | 118.39 | 115.87 | 112.69 | 110.17 | 109.95 |
|         | 97.01  | 106.18 | 107.26 | 107.83 | 111.15 | 108.60 | 104.33 | 104.78 | 102.23 | 97.52  | 94.65  | 92.42  | 90.19  |
|         | 98.62  | 107.02 | 107.77 | 108.00 | 109.32 | 109.32 | 104.14 | 98.56  | 97.07  | 92.87  | 89.36  | 87.05  | 84.18  |
| CCFM1   | 98.14  | 104.43 | 106.45 | 100.11 | 108.74 | 108.52 | 105.85 | 102.95 | 98.31  | 99.78  | 95.63  | 90.22  | 88.96  |
|         | 96.04  | 97.38  | 97.16  | 98.33  | 92.25  | 85.67  | 82.89  | 77.26  | 73.24  | 71.35  | 66.39  | 63.82  | 62.65  |
|         | 101.35 | 105.49 | 109.41 | 105.27 | 109.98 | 113.40 | 111.12 | 110.55 | 106.99 | 109.55 | 104.28 | 102.71 | 99.93  |
|         | 92.66  | 97.89  | 107.57 | 98.36  | 98.65  | 92.31  | 88.08  | 85.73  | 82.21  | 77.98  | 73.75  | 71.99  | 70.93  |
|         | 99.94  | 108.71 | 109.15 | 106.42 | 91.80  | 92.69  | 90.46  | 89.32  | 83.73  | 80.29  | 77.30  | 74.57  | 75.02  |
|         | 99.13  | 100.56 | 101.75 | 97.44  | 91.32  | 95.94  | 93.63  | 91.57  | 91.51  | 88.45  | 87.45  | 83.90  | 82.58  |
| CCFM1   | 98.65  | 104.74 | 103.02 | 105.60 | 108.62 | 107.88 | 105.79 | 111.33 | 108.81 | 108.00 | 107.14 | 105.05 | 103.69 |
|         | 99.05  | 107.28 | 106.63 | 108.82 | 106.34 | 103.61 | 100.53 | 93.07  | 92.66  | 87.27  | 84.07  | 82.24  | 81.29  |
|         | 104.44 | 106.69 | 113.92 | 102.65 | 107.42 | 110.07 | 105.57 | 100.46 | 98.28  | 99.67  | 96.89  | 96.95  | 93.70  |
|         | 94.43  | 101.73 | 105.69 | 102.66 | 111.76 | 110.71 | 109.59 | 110.52 | 111.08 | 112.07 | 109.16 | 107.67 | 107.49 |
|         | 93.81  | 100.90 | 96.70  | 101.20 | 99.76  | 92.43  | 91.59  | 85.83  | 85.47  | 82.64  | 79.34  | 75.80  | 74.29  |
|         | 90.19  | 99.83  | 100.50 | 101.57 | 100.95 | 101.68 | 104.49 | 102.41 | 100.95 | 99.33  | 97.36  | 95.12  | 95.91  |
| HeNJZ8  | 91.63  | 101.51 | 104.07 | 104.01 | 101.22 | 95.53  | 89.83  | 86.52  | 79.08  | 72.92  | 68.74  | 66.12  | 66.41  |
|         | 96.02  | 99.20  | 100.12 | 92.77  | 100.80 | 101.90 | 102.70 | 102.21 | 97.24  | 94.55  | 94.18  | 90.44  | 89.95  |
|         | 88.57  | 100.00 | 102.71 | 101.68 | 88.70  | 90.20  | 87.13  | 84.19  | 80.64  | 77.75  | 73.90  | 70.29  | 70.17  |
|         | 94.92  | 105.82 | 107.99 | 108.49 | 105.82 | 102.23 | 97.27  | 97.71  | 92.57  | 87.73  | 82.16  | 77.76  | 75.96  |

|       |       |        |        |        |        |        |        |        |        |        |        |        |        |
|-------|-------|--------|--------|--------|--------|--------|--------|--------|--------|--------|--------|--------|--------|
|       | 94.72 | 106.83 | 110.06 | 106.58 | 106.58 | 101.12 | 94.53  | 93.17  | 87.70  | 81.49  | 76.52  | 74.66  | 72.24  |
|       | 90.07 | 96.56  | 99.25  | 100.81 | 105.42 | 98.87  | 95.97  | 95.81  | 103.11 | 101.18 | 95.17  | 90.02  | 89.64  |
|       | 94.05 | 103.75 | 107.67 | 110.29 | 109.16 | 103.75 | 104.70 | 108.20 | 108.20 | 104.34 | 101.90 | 99.88  | 98.10  |
| CCFM1 | 95.62 | 104.14 | 107.12 | 105.49 | 110.16 | 108.81 | 109.28 | 106.77 | 107.24 | 105.08 | 100.35 | 96.79  | 99.01  |
| 029   | 99.66 | 100.22 | 97.99  | 99.55  | 104.47 | 103.57 | 103.13 | 102.07 | 101.17 | 102.90 | 104.75 | 104.69 | 102.51 |
|       | 96.41 | 109.46 | 110.03 | 111.17 | 113.90 | 113.96 | 112.25 | 111.91 | 105.13 | 102.62 | 100.80 | 97.66  | 98.52  |
|       | 94.71 | 101.29 | 102.59 | 104.17 | 101.18 | 107.29 | 108.81 | 105.05 | 100.71 | 100.18 | 97.94  | 98.12  | 94.65  |
